# Supplementary material
Source: publisher figshare collection journal article supplement (https://gsajournals.figshare.com/ndownloader/files/14331824)
Supplement: Supplementary file 1 [file 14331824]

**Identification and expression analysis of long noncoding RNAs in fat-tail of sheep breeds**

Mohammad Reza Bakhtiarizadeha*, [Seyed Alireza Salami](https://www.nature.com/articles/s41598-017-15816-5#auth-4)b

a Department of Animal and Poultry Science, College of Aburaihan, University of Tehran, Tehran, Iran

b University of Tehran, Tehran, Iran

* Corresponding author. E-mail address: mrbakhtiari@ut.ac.ir

**Supplementary Information I1**

**Figure I1** A hierarchical clustering analysis of all the biological samples. LB and ZL denotes Lori-Bakhtiari and Zel sheep breeds.


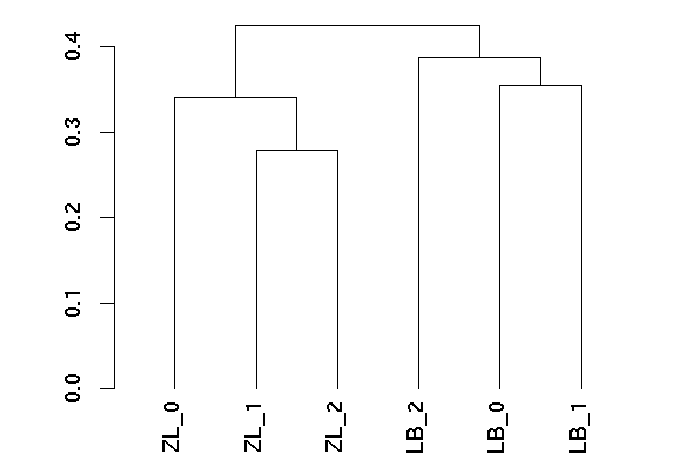


Distance


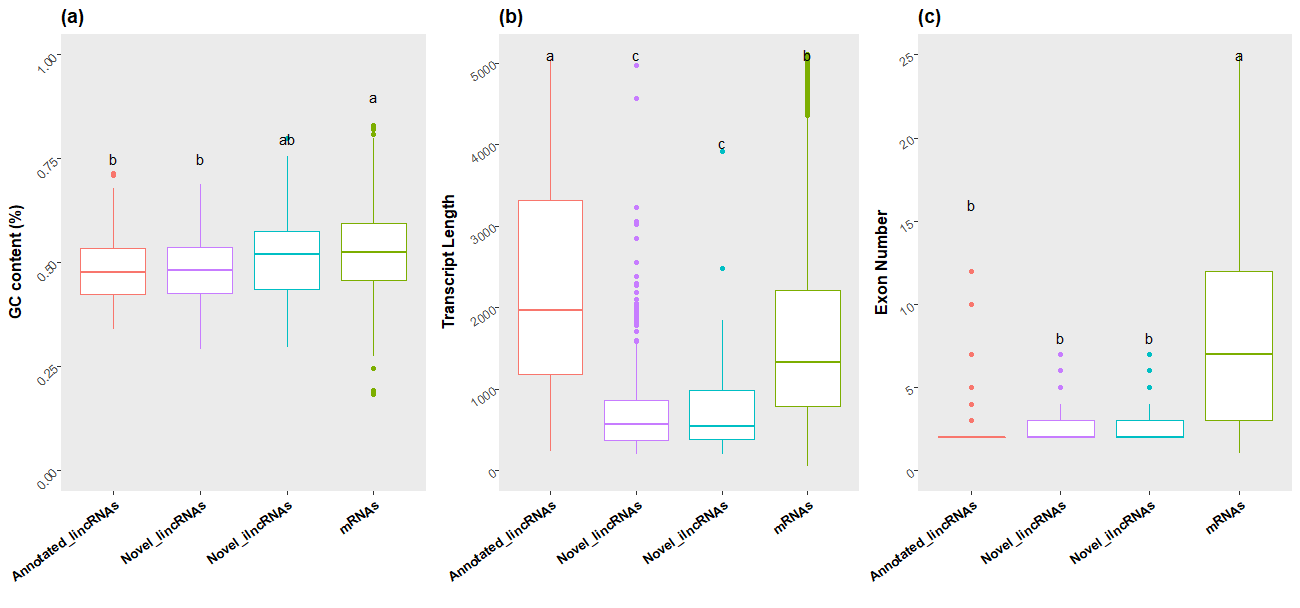
**Figure I2** Comparisons of GC content (a), transcript length (b) and exon number (c) among novel and annotated transcripts. In all figures, a, b, c and d denote the results of statistical analysis and the boxes sharing a common letter are not significantly different (p<0.05).


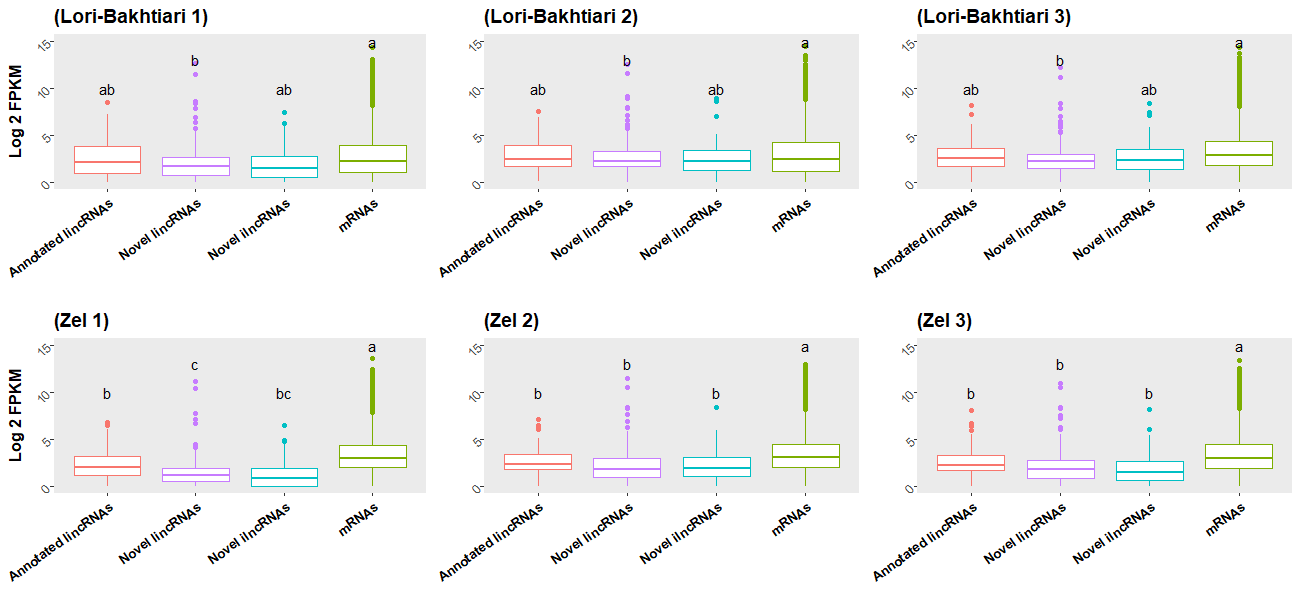
**Figure I3** Gene expression patterns of different genes in different samples. In all figures, a, b, c and d denote the results of statistical analysis and the boxes sharing a common letter are not significantly different (p<0.05).
